# Supplementary material
Source: PubMed Central journal article supplement (PMC3206743)
Supplement: Supp_Data.pdf [file Supp_Data.pdf]

## Supplementary Data

SUPPLEMENTARY TABLE S1A. CROSS-SECTIONAL AND LONGITUDINAL EFFECT OF PERIODONTAL DISEASE MEASURES ON IMT

| Exposure variable                     | Mean estimate (95% CI)                                                         | p-value | Mean estimate (95% CI)                                                   | p-value |
|---------------------------------------|--------------------------------------------------------------------------------|---------|--------------------------------------------------------------------------|---------|
| <i>Clinical measures of PD</i>        | <i>Increase in baseline IMT per 10% increase in baseline PD</i>                |         | <i>Increase in delta IMT per 10% increase in delta PD</i>                |         |
| PPD                                   | 0.0064 (−0.0091, 0.0220)                                                       | 0.36    | −0.0028 (−0.0227, 0.0171)                                                | 0.75    |
| REC                                   | 0.0034 (−0.0067, 0.0135)                                                       | 0.45    | 0.0013 (−0.0140, 0.0167)                                                 | 0.84    |
| CAL                                   | 0.0055 (−0.0032, 0.0142)                                                       | 0.18    | −0.0062 (−0.0248, 0.0125)                                                | 0.46    |
| BOP                                   | −0.0063 (−0.0211, 0.0084)                                                      | 0.34    | −0.0059 (−0.0184, 0.0067)                                                | 0.31    |
| <i>Microbiological measures of PD</i> | <i>Increase in baseline IMT per 1-log<sub>10</sub> increase in baseline PD</i> |         | <i>Increase in delta IMT per 1-log<sub>10</sub> increase in delta PD</i> |         |
| <i>P. gingivalis</i>                  | −0.0082 (−0.0271, 0.0107)                                                      | 0.33    | 0.0102 (−0.0049, 0.0253)                                                 | 0.15    |
| <i>T. denticola</i>                   | −0.0242 (−0.0462, −0.0022)                                                     | 0.04    | 0.0059 (−0.0070, 0.0188)                                                 | 0.32    |
| <i>T. forsythia</i>                   | −0.0165 (−0.0463, 0.0133)                                                      | 0.23    | 0.0100 (−0.0087, 0.0286)                                                 | 0.25    |
| 23S rRNA                              | 0.0397 (−0.0380, 0.1174)                                                       | 0.27    | 0.0133 (−0.0485, 0.0751)                                                 | 0.63    |

PD, periodontal disease; IMT, carotid artery intima media thickness; PPD, periodontal probing depth; REC, gingival recession; CAL, clinical attachment level; BOP, bleeding on probing; *P. gingivalis*, *Porphyromonas gingivalis*; *T. denticola*, *Treponema denticola*; *T. forsythia*, *Tannerella forsythia*; 23S rRNA, 23S ribosomal RNA. Model adjusted for time on study only.

SUPPLEMENTARY TABLE S1B. CROSS-SECTIONAL AND LONGITUDINAL EFFECT OF PERIODONTAL DISEASE MEASURES ON IMT

| Exposure variable                     | Mean estimate (95% CI)                                                                | p-value | Mean estimate (95% CI)                                                                                                           | p-value |
|---------------------------------------|---------------------------------------------------------------------------------------|---------|----------------------------------------------------------------------------------------------------------------------------------|---------|
| <i>Clinical measures of PD</i>        | <i>Increase in baseline IMT per 10% increase in baseline PD</i>                       |         | <i>Greater increase in IMT from baseline per 10% greater increase in the clinical measure of PD from baseline</i>                |         |
| PPD                                   | 0.0010 (−0.0126, 0.0146)                                                              | 0.86    | 0.0041 (−0.0095, 0.0176)                                                                                                         | 0.49    |
| REC                                   | 0.0030 (−0.0047, 0.0107)                                                              | 0.38    | −0.0011 (−0.0130, 0.0107)                                                                                                        | 0.83    |
| CAL                                   | 0.0028 (−0.0034, 0.0089)                                                              | 0.32    | −0.0067 (−0.0225, 0.0090)                                                                                                        | 0.34    |
| BOP                                   | 0.0021 (−0.0140, 0.0182)                                                              | 0.76    | 0.0001 (−0.0108, 0.0110)                                                                                                         | 0.98    |
| <i>Microbiological measures of PD</i> | <i>Increase in baseline IMT per 1-log<sub>10</sub> change increase in baseline PD</i> |         | <i>Greater increase in IMT from baseline per 1-log<sub>10</sub> greater increase in the clinical measure of PD from baseline</i> |         |
| <i>P. gingivalis</i>                  | −0.0079 (−0.0224, 0.0066)                                                             | 0.24    | 0.0125 (−0.0020, 0.0269)                                                                                                         | 0.08    |
| <i>T. denticola</i>                   | −0.0122 (−0.0280, 0.0037)                                                             | 0.11    | 0.0091 (−0.0039, 0.0220)                                                                                                         | 0.14    |
| <i>T. forsythia</i>                   | −0.0085 (−0.0256, 0.0085)                                                             | 0.27    | 0.0167 (−0.0009, 0.0344)                                                                                                         | 0.06    |
| 23S rRNA                              | 0.0503 (−0.0225, 0.1231)                                                              | 0.15    | 0.0273 (−0.0187, 0.0733)                                                                                                         | 0.20    |

PD, periodontal disease; IMT, carotid artery intima media thickness; PPD, periodontal probing depth; REC, gingival recession; CAL, clinical attachment level; BOP, bleeding on probing; *P. gingivalis*, *Porphyromonas gingivalis*; *T. denticola*, *Treponema denticola*; *T. forsythia*, *Tannerella forsythia*; 23S rRNA, 23S ribosomal RNA. Model adjusted for time on study and CVD-specific variables including age, male gender, total smoking exposure, body mass index, systolic BP, high sensitivity C-reactive protein.

SUPPLEMENTARY TABLE S2A. CROSS-SECTIONAL AND LONGITUDINAL EFFECT OF PERIODONTAL DISEASE MEASURES ON FMD

| Exposure variable                    | Mean estimate (95% CI)                                                         | p-value | Mean estimate (95% CI)                                                   | p-value |
|--------------------------------------|--------------------------------------------------------------------------------|---------|--------------------------------------------------------------------------|---------|
| <i>Clinical measure of PD</i>        | <i>Increase in baseline FMD per 10% increase in baseline PD</i>                |         | <i>Increase in delta FMD per 10% increase in the delta PD</i>            |         |
| PPD                                  | 0.1138 (-0.9651, 1.1927)                                                       | 0.81    | -0.0393 (-2.1823, 2.1036)                                                | 0.97    |
| REC                                  | -0.6512 (-1.5608, 0.2585)                                                      | 0.13    | 1.8094 (0.0306, 3.5883)                                                  | 0.05    |
| CAL                                  | -0.3491 (-1.1969, 0.4987)                                                      | 0.36    | 1.0862 (-1.5114, 3.6838)                                                 | 0.36    |
| BOP                                  | -0.1998 (-1.3472, 0.9477)                                                      | 0.69    | -0.5621 (-2.1660, 1.0418)                                                | 0.43    |
| <i>Microbiological measure of PD</i> | <i>Increase in baseline FMD per 1-log<sub>10</sub> increase in baseline PD</i> |         | <i>Increase in delta FMD per 1-log<sub>10</sub> increase in delta PD</i> |         |
| <i>P. gingivalis</i>                 | -0.0487 (-1.3022, 1.2049)                                                      | 0.93    | 0.3542 (-1.2288, 1.9372)                                                 | 0.60    |
| <i>T. denticola</i>                  | -0.4461 (-1.8707, 0.9786)                                                      | 0.48    | -0.8179 (-3.2475, 1.6116)                                                | 0.45    |
| <i>T. forsythia</i>                  | -0.3423 (-1.9660, 1.2814)                                                      | 0.63    | -0.8437 (-2.7736, 1.0862)                                                | 0.34    |
| 23S rDNA                             | -3.0953 (-8.1935, 2.0029)                                                      | 0.19    | 1.7863 (-2.6443, 6.2169)                                                 | 0.37    |

PD, periodontal disease; FMD, brachial artery flow-mediated dilation; PPD, periodontal probing depth; REC, gingival recession; CAL, clinical attachment level; BOP, bleeding on probing; *P. gingivalis*, *Porphyromonas gingivalis*; *T. forsythia*, *Tannerella forsythia*; *T. denticola*, *Treponema denticola*; 23S rDNA, 23S ribosomal RNA. Model Adjusted for time on study only.

SUPPLEMENTARY TABLE S2B. CROSS-SECTIONAL AND LONGITUDINAL EFFECT OF PERIODONTAL DISEASE MEASURES ON FMD

| Exposure variable                     | Mean estimate (95% CI)                                                         | p-value | Mean estimate (95% CI)                                                   | p-value |
|---------------------------------------|--------------------------------------------------------------------------------|---------|--------------------------------------------------------------------------|---------|
| <i>Clinical measures of PD</i>        | <i>Increase in baseline FMD per 10% increase in baseline PD</i>                |         | <i>Increase in delta FMD per 10% increase in delta PD</i>                |         |
| PPD                                   | 0.0007 (-1.0963, 1.0977)                                                       | 1.00    | 0.0588 (-2.1379, 2.2554)                                                 | 0.95    |
| REC                                   | -0.2949 (-1.2161, 0.6264)                                                      | 0.47    | 2.0450 (0.2492, 3.8409)                                                  | 0.03    |
| CAL                                   | -0.1412 (-0.9768, 0.6944)                                                      | 0.70    | 1.2042 (-1.4335, 3.8419)                                                 | 0.32    |
| BOP                                   | -0.2832 (-1.2641, 0.6977)                                                      | 0.52    | -0.6771 (-2.2621, 0.9079)                                                | 0.35    |
| <i>Microbiological measures of PD</i> | <i>Increase in baseline FMD per 1-log<sub>10</sub> increase in baseline PD</i> |         | <i>Increase in delta FMD per 1-log<sub>10</sub> increase in delta PD</i> |         |
| <i>P. gingivalis</i>                  | -0.1868 (-1.5240, 1.1505)                                                      | 0.75    | 0.4952 (-1.1120, 2.1024)                                                 | 0.49    |
| <i>T. denticola</i>                   | -0.5890 (-2.1969, 1.0190)                                                      | 0.42    | -0.6251 (-3.1014, 1.8512)                                                | 0.57    |
| <i>T. forsythia</i>                   | -0.3663 (-1.9794, 1.2469)                                                      | 0.60    | -0.8996 (-3.0303, 1.2312)                                                | 0.34    |
| 23S rDNA                              | -1.6999 (-7.7692, 4.3694)                                                      | 0.53    | 1.5604 (-2.8014, 5.9221)                                                 | 0.43    |

PD, periodontal disease; FMD, brachial artery flow-mediated dilation; PPD, periodontal probing depth; REC, gingival recession; CAL, clinical attachment level; BOP, bleeding on probing; *P. gingivalis*, *Porphyromonas gingivalis*; *T. forsythia*, *Tannerella forsythia*; *T. denticola*, *Treponema denticola*; 23S rDNA, 23S ribosomal RNA. Model adjusted for time on study and CVD-specific variables including age, male gender, total smoking exposure, body mass index, systolic BP, high sensitivity C-reactive protein.
